# Supplementary material for: Increased risk of hypocalcemia with decreased kidney function in patients prescribed bisphosphonates based on real-world data from the MID-NET® in Japan: a new-user cohort study
Source: Springer Nature journal article supplement (doi:10.1186/s12882-024-03553-7), 2024-04-15
Supplement: MOESM2 [file 26980736]

**Additional file 2: Table S1 Hazard ratios for hypocalcemia in the subgroup analysis on each bisphosphonate preparation (vs normal group)**

| Active Ingredient          | Category | Number of patients <sup>a</sup> | Follow-up period (patient-year) | Number of cases <sup>a</sup> | Incidence rate <sup>a</sup> [95%CI] (/patient-year) |               | cHR <sup>b</sup> [95%CI] |               | aHR <sup>b</sup> [95%CI] |               |
|----------------------------|----------|---------------------------------|---------------------------------|------------------------------|-----------------------------------------------------|---------------|--------------------------|---------------|--------------------------|---------------|
|                            |          |                                 |                                 |                              |                                                     |               |                          |               |                          |               |
| Alendronate sodium hydrate | Normal   | 1,390                           | 283.57                          | <10                          | <0.035                                              | -             | reference                |               | reference                |               |
|                            | Mild     | 4,120                           | 1,141.09                        | 17                           | 0.015                                               | [0.008-0.022] | 1.32                     | [0.44-3.94]   | 1.66                     | [0.55-5.00]   |
|                            | Moderate | 2,192                           | 598.27                          | 11                           | 0.018                                               | [0.007-0.029] | 1.63                     | [0.52-5.12]   | 2.31                     | [0.70-7.69]   |
|                            | Severe   | 270                             | 50.20                           | 10                           | 0.199                                               | [0.076-0.322] | 13.53                    | [4.24-43.16]  | 16.03                    | [4.68-54.96]  |
| Etidronate disodium        | Normal   | <18                             | 1.61                            | 0                            | -                                                   | -             | reference                |               | reference                |               |
|                            | Mild     | 11                              | 0.83                            | 0                            | -                                                   | -             | -                        | -             | -                        | -             |
|                            | Moderate | <10                             | 0.28                            | 0                            | -                                                   | -             | -                        | -             | -                        | -             |
|                            | Severe   | 0                               | 0.00                            | 0                            | -                                                   | -             | -                        | -             | -                        | -             |
| Ibandronate sodium hydrate | Normal   | 25                              | 10.67                           | 0                            | -                                                   | -             | reference                |               | reference                |               |
|                            | Mild     | 56                              | 25.83                           | 0                            | -                                                   | -             | -                        | -             | -                        | -             |
|                            | Moderate | 34                              | 24.52                           | 0                            | -                                                   | -             | -                        | -             | -                        | -             |
|                            | Severe   | <10                             | 0.56                            | 0                            | -                                                   | -             | -                        | -             | -                        | -             |
| Minodronic acid hydrate    | Normal   | 387                             | 253.66                          | <10                          | <0.039                                              | -             | reference                |               | reference                |               |
|                            | Mild     | 1,277                           | 925.26                          | <10                          | <0.011                                              | -             | 1.14                     | [0.13-10.23]  | 1.09                     | [0.12-10.31]  |
|                            | Moderate | 608                             | 388.21                          | <10                          | <0.026                                              | -             | 1.27                     | [0.12-13.98]  | 1.15                     | [0.09-14.61]  |
|                            | Severe   | 60                              | 33.80                           | <10                          | <0.296                                              | -             | 29.23                    | [3.26-261.83] | 40.21                    | [3.75-430.64] |
| Sodium risedronate hydrate | Normal   | 781                             | 201.63                          | <10                          | <0.050                                              | -             | reference                |               | reference                |               |
|                            | Mild     | 2,098                           | 700.87                          | <10                          | <0.014                                              | -             | 1.50                     | [0.17-13.45]  | 1.78                     | [0.19-16.36]  |
|                            | Moderate | 1,050                           | 340.66                          | <10                          | <0.029                                              | -             | 2.22                     | [0.23-21.36]  | 2.57                     | [0.24-27.08]  |
|                            | Severe   | 82                              | 11.52                           | <10                          | <0.868                                              | -             | 24.38                    | [2.20-269.82] | 23.03                    | [1.89-280.35] |
| Zoledronic acid hydrate    | Normal   | <10                             | 3.87                            | 0                            | -                                                   | -             | reference                |               | reference                |               |
|                            | Mild     | 51                              | 32.35                           | <10                          | <0.309                                              | -             | -                        | -             | -                        | -             |
|                            | Moderate | <35                             | 22.49                           | 0                            | -                                                   | -             | -                        | -             | -                        | -             |
|                            | Severe   | <10                             | 3.49                            | 0                            | -                                                   | -             | -                        | -             | -                        | -             |

aHR: adjusted hazard ratio, cHR: crude hazard ratio, CI: confidence interval

<sup>a</sup> When the number of patients was <10, an aggregated value was presented based on the MID-NET<sup>®</sup> publication rule, so that a specific number could not be identified.

<sup>b</sup> aHR and cHR were calculated based on the Cox proportional hazards model and aHR was adjusted with the covariates (see “Methods”)
